# Supplementary material
Source: PubMed Central journal article supplement (PMC2893405)

Set I: Genes with expression induced, enhanced and/or sustained by IL-12 at 72 hr

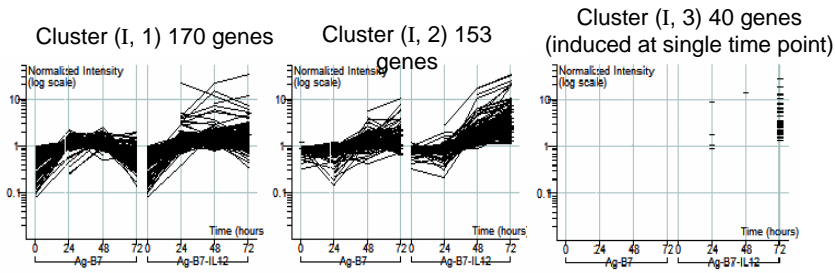

Set II: Genes with expression downregulated by Ag-B7 but sustained by IL-12

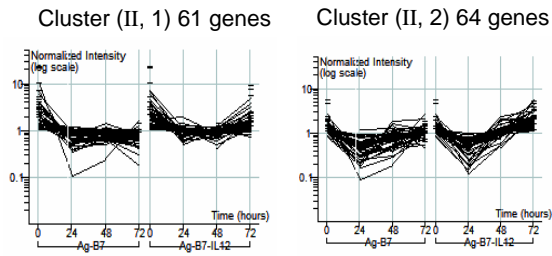

Set III: Genes with expression decreased by IL-12 at 72 hr

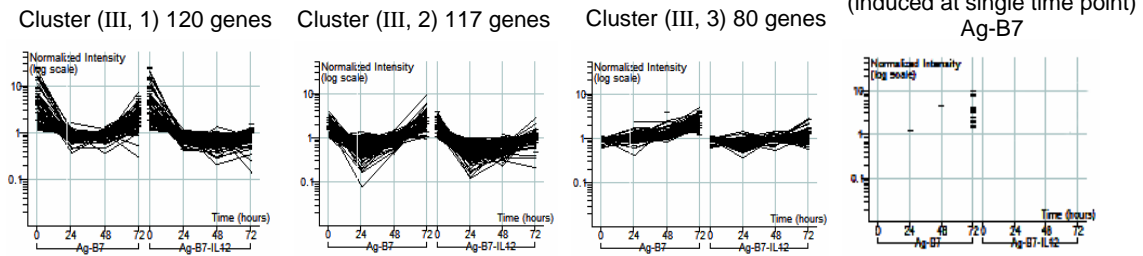

Set IV: Other  
84 genes

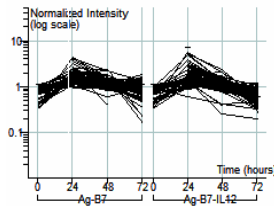

Supplement: NIHMS201792-supplement-Fig__S1.pdf [file NIHMS201792-supplement-Fig__S1.pdf]
