# Supplementary material
Source: PubMed Central journal article supplement (PMC2893405)

Set I : Genes with expression induced, enhanced and/or sustained by IFN $\alpha$  at 72hr

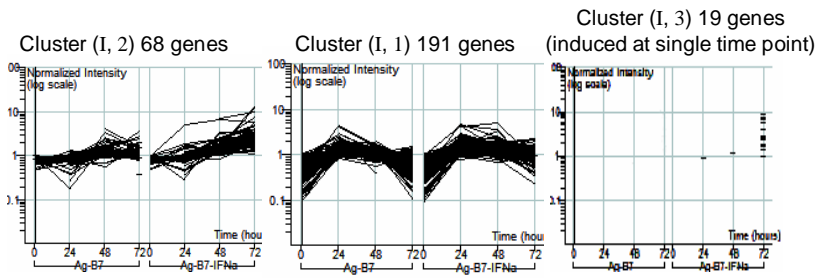

Set II : Genes with expression downregulated by Ag-B7 but sustained by IFN $\alpha$

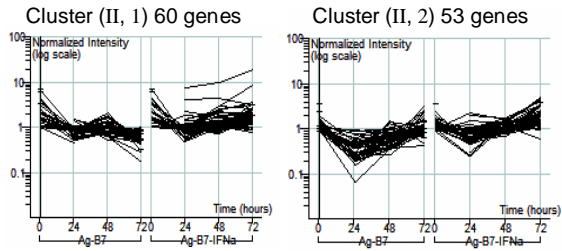

Set III : Genes with expression by IFN $\alpha$  at 72hr

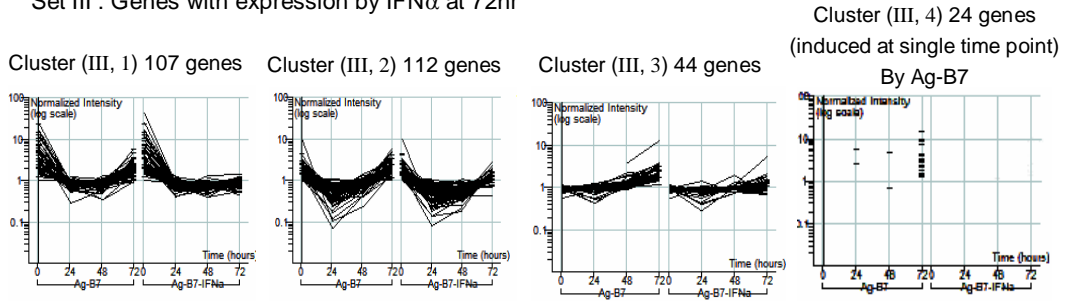

Set IV: Other

36 genes

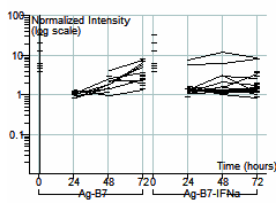

Supplement: NIHMS201792-supplement-Fig__S2.pdf [file NIHMS201792-supplement-Fig__S2.pdf]
